# Supplementary material
Source: PubMed Central journal article supplement (PMC4262249)
Supplement: NIHMS647134-supplement-Suppl_Table_1S.pdf [file NIHMS647134-supplement-Suppl_Table_1S.pdf]

## SUPPLEMENTAL MATERIAL

**Table 1S. Comparison of Patient Characteristics Between the Current Cohort and the Studies of the Pediatric Heart Network and Khairy et al.**

|                                           | Rathod et al.<br>(n=215) | PHN <sup>1</sup><br>(n=546)<br>(CMR n=161) | P Value |
|-------------------------------------------|--------------------------|--------------------------------------------|---------|
| Gender (male)                             | 136 (63%)                | 328 (60%)                                  | 0.5     |
| Age at Fontan (years)                     | 6.1 ± 6.5                | 3.4 ± 2.1                                  | <0.001  |
| Age at CMR (years)                        | 20.5 ± 10.2              | 11.9 ± 3.4                                 | <0.001  |
| Fontan type                               |                          |                                            | 0.01    |
| Lateral tunnel                            | 151 (70%)                | 369 (72%)                                  |         |
| Right atrium-pulmonary artery             | 44 (21%)                 | 67 (13%)                                   |         |
| Extracardiac                              | 11 (5%)                  | 67 (13%)                                   |         |
| Right atrium-right ventricle              | 19 (9%)                  | 10 (2%)                                    |         |
| Ventricular morphology                    |                          |                                            | 0.06    |
| Left ventricle                            | 96 (45%)                 | 268 (49%)                                  |         |
| Right ventricle                           | 66 (30%)                 | 186 (34%)                                  |         |
| Biventricular                             | 53 (25%)                 | 92 (18%)                                   |         |
| History of bidirectional Glenn            | 112 (52%)                | 410 (75%)                                  | <0.001  |
| EDV <sub>i</sub> (mL/BSA <sup>1,3</sup> ) | 102 ± 44                 | 85 ± 25                                    | <0.001  |
| ESV <sub>i</sub> (mL/BSA <sup>1,3</sup> ) | 50 ± 34                  | 37 ± 16                                    | <0.001  |
| Stroke volume <sub>i</sub> (mL/BSA)       | 59 ± 17                  | 51 ± 14                                    | 0.01    |
| Ejection fraction (%)                     | 54 ± 10                  | 57 ± 10                                    | 1.0     |
| Mass <sub>i</sub> (g/BSA <sup>1,3</sup> ) | 60 ± 24                  | 72 ± 21                                    | 0.07    |
| Mass/volume ratio (g/mL)                  | 0.62 ± 0.23              | 0.89 ± 0.31                                | <0.001  |
|                                           | Rathod et al.<br>(n=215) | Khairy et al. <sup>2</sup><br>(n=261)      | P Value |
| Gender (male)                             | 136 (63%)                | 140 (54%)                                  | 0.04    |
| Age at Fontan (years)                     | 3.6 [2.3, 7.1]           | 7.9 [4.4, 14.8]                            | <0.001  |
| Fontan type                               |                          |                                            | <0.001  |
| Lateral tunnel                            | 151 (70%)                | 98 (37%)                                   |         |
| Right atrium-pulmonary artery             | 44 (21%)                 | 135 (52%)                                  |         |
| Extracardiac                              | 11 (5%)                  | 3 (1%)                                     |         |
| Right atrium-right ventricle              | 19 (9%)                  | 25 (10%)                                   |         |
| Ventricular morphology                    |                          |                                            | <0.001  |
| Left ventricle                            | 96 (45%)                 | 171 (66%)                                  |         |
| Right ventricle                           | 66 (30%)                 | 79 (30%)                                   |         |
| Biventricular                             | 53 (25%)                 | 11 (4%)                                    |         |
| Follow-up interval (years)                | 4.1 [2.6, 6.2]           | 12.2 [1.1, 17.5]                           | <0.001  |
| History of Fontan revision                | 19 (9%)                  | 5 (2%)                                     | <0.001  |
| Death                                     | 20 (9%)                  | 76 (29%)                                   | <0.001  |
| Cardiac transplantation                   | 5 (2%)                   | 5 (2%)                                     | 0.8     |

**Abbreviations:** BSA = body surface area; CMR = cardiac magnetic resonance; EDV = end-diastolic volume; ESV = end-systolic volume.
